# Supplementary material for: E-learning course in laboratory animal science: participants’ characteristics and points of view
Source: Research Square preprint supplement (doi:10.21203/rs.3.rs-1538262/v1), 2022-04-26
Supplement: Supplementary file 1 [file 17dbea75e323293d6bc29d2d.docx]

Table A. The most important course topics selected by the participants (N=174).

| **Course topic** | **Frequency** | **Percentage** |
| --- | --- | --- |
| Ethics in laboratory animal research | 60 | 34.5 |
| Replacements to laboratory animals | 22 | 12.6 |
| The guideline for the care and use of laboratory animals in Iran | 20 | 11.5 |
| Recognition of pain and distress in laboratory animals | 10 | 5.7 |
| Principles of anesthesia and algesia in laboratory animals | 9 | 5.2 |
| Designing the method of animal use in research | 9 | 5.2 |
| Principles of substance administration to laboratory animals | 7 | 4 |
| Basic biology of common laboratory animal species | 7 | 4 |
| No idea | 7 | 4 |
| Humane endpoints and euthanasia of laboratory animals | 6 | 3.4 |
| Sample size calculation in animal studies | 4 | 2.3 |
| Selecting a research topic and accessing relevant scientific resources | 3 | 1.7 |
| Principles of laboratory animal transportation | 3 | 1.7 |
| Principles of sampling | 3 | 1.7 |
| Animal care and basic standards of animal Facilities | 3 | 1.7 |
| Selecting an animal model | 1 | 0.6 |

Table B. The least important course topics selected by the participants (N=174).

| **Course topic** | **Frequency** | **Percentage** |
| --- | --- | --- |
| No idea | 55 | 31.6 |
| Principles of laboratory animal transportation | 16 | 9.2 |
| Replacements to laboratory animals | 16 | 9.2 |
| Selecting a research topic and accessing relevant scientific resources | 15 | 8.6 |
| Completion of the ethics application form for laboratory animal studies | 13 | 7.5 |
| Ethics in laboratory animal research | 11 | 6.3 |
| Animal care and basic standards of animal Facilities | 7 | 4 |
| The guideline for the care and use of laboratory animals in Iran | 7 | 4 |
| Principles of designing interventional studies | 6 | 3.4 |
| Reporting the results of laboratory animal studies | 5 | 2.9 |
| Sample size calculation in animal studies | 4 | 2.3 |
| Basic biology of common laboratory animal species | 3 | 1.7 |
| Selecting an animal model | 3 | 1.7 |
| Principles of experimental surgery | 3 | 1.7 |
| Safety in laboratory animal facilities | 2 | 1.1 |
| Humane endpoints and euthanasia of laboratory animals | 2 | 1.1 |
| Recognition of pain and distress in laboratory animals | 2 | 1.1 |
| Principles of substance administration to laboratory animals | 2 | 1.1 |
| Designing the method of animal use in research | 1 | 0.6 |
| Principles of sampling | 1 | 0.6 |
