# Supplementary material for: E-learning course in laboratory animal science: participants’ characteristics and points of view
Source: Research Square preprint supplement (doi:10.21203/rs.3.rs-1538262/v1), 2022-04-26
Supplement: Supplementary file 2 [file 7a7987e9a0d5e2299651c980.docx]

Table A. Topics, sub-topics, and duration of the e-course.

| **Topics/subtopics** | **Duration (min.)** |
| --- | --- |
| Ethics in laboratory animal research   - Animals as living beings: familiarization with normal lives of animals - Why do we use animals in research? - Speciesism and other types of animals discrimination - Various aspects of ethics in laboratory animal research - Animal rights and animal welfare - Principles of 3Rs | 57 |
| An introduction to the guideline for the care and use of laboratory animals in Iran | 11 |
| Replacements to laboratory animals   - Human volunteers - Human tissues - Cells - Less sentient animals or non-sentient living beings - Systematic reviews and meta-analyses - Computer models - Mathematical models - Replacements for educational purposes - How to find valid replacement methods | 61 |
| Selecting a research topic and accessing relevant scientific resources   - Topic selection - Harm-benefit analysis - Necessities for successful initiation and completion of an animal study - Identifying, accessing, and validating relevant scientific resources | 47 |
| Principles of design of interventional studies   - Various types of interventional studies - Various designs of animal studies - Management of variations in animal studies: signal to noise ratio | 29 |
| Sample size calculation in animal studies   - Defining the sample size according to previous similar studies - Power analysis method - Resource equation method - Adjustments of the calculated sample size | 54 |
| Basic biology of common laboratory animal species   - Laboratory mice - Laboratory rats - Hamsters - Guinea pigs - Rabbits | 60 |
| Animal care and basic standards of animal Facilities   - Structure and parts of a standard animal facility - General principles of laboratory animal care - Solitary or group housing - Indoor or outdoor enclosures - Environmental conditions (temperature, humidity, light, noise, surface vibration, quality of air) - Feed and drinking water - Environmental enrichment - Cleaning routines - Preparedness for emergencies | 120 |
| Selecting an animal model   - Important aspects of a proper animal model - Methods of modeling diseases on animals - Selection criteria for choosing the best animal model | 37 |
| Defining the steps of a research   - Designing a flowchart for the research - Inducing the disease model | 28 |
| Completing the ethics application form for laboratory animal researches   - General considerations - Discussing tables 1-17 of the form | 123 |
| Safety in laboratory animal facilities   - General principles of risk assessment - General principles of risk prevention - General principles of risk reduction - General principles of adverse event management - Prevention and management of the environmental risks - Prevention and management of the physical injuries caused by animals - Prevention and management of physical injuries caused by objects - Allergies - Zoonoses | 48 |
| Principles of laboratory animal transportation   - Causes of distress in transportation - General principles of transportation of healthy animals - Transportation of sick animals - Transportation of pregnant animals - Adverse events in transportation - The transportation vehicle - The driver - The animal enclosure during transportation - Animal housing density during transportation - Air transportation - Feeding and watering during transportation - Rodents’ transportation - Rabbits’ transportation - Acclimatization period | 109 |
| Principles of substance administration to laboratory animals   - Various methods of substance administration - Dose calculation - Concentration adjustment - Oral administration - Parenteral administration - Intravenous injection - Intraperitoneal injection - Intramuscular injection - Subcutaneous injection - Intradermal injection | 89 |
| Principles of sampling   - Compatibility of the sampling method with research requirements - Compatibility of the sampling method with ethical requirements - Principles of tissue sampling - Principles of blood sampling - Tail vein blood sampling in mouse and rat - Saphenous vein blood sampling in mouse and rat - Retro orbital plexus blood sampling in mouse - Cardiac puncture - Exsanguination - Other blood sampling methods in rodents - Rabbit blood sampling - Sample management | 56 |
| Recognition of pain and distress in laboratory animals   - Clinical evaluation of the animal welfare - General methods of pain recognition - Signs of pain and distress in mice and rats - Grimace scale in mice and rats - Signs of pain and distress in rabbits - Grimace scale in rabbits - Using score sheets | 56 |
| Principles of anesthesia and algesia in laboratory animals   - Definition of the common anesthetic terms - Distraction, tranquilization, and sedation - Hypnosis - Surgical pain relief - Opioids - Non-steroidal anti-inflammatory drugs - Local anesthetics - α2-adrenergic agonists - Neuromuscular blocking agents - Anticholinergics - General anesthesia - Surgical anesthesia - Selecting an anesthetic protocol - Premedication - Anesthetic maintenance - Anesthetic care and monitoring - Clinical evaluation of the anesthetic depth - Clinical evaluation of pain - Anesthetic recovery - Post anesthetic care - Fluid therapy - Specific topics in rodents’ and rabbits’ anesthesia - Common mistakes in laboratory animal anesthesia | 181 |
| Principles of experimental surgery   - Planning for surgery - Place and time of surgery - Surgical preparation (animal) - Surgical preparation (surgeon and the team) - Surgical preparation (environment) - Surgical instruments - Disinfection and sterilization - Halsted’s principles - Tissue handling - Hemostasis - Aseptic technique - Obliteration of dead space - Surgical recovery | 73 |
| Humane endpoints and euthanasia of laboratory animals   - Signs of impaired animal health - Humane endpoints - Criteria for euthanasia - Methods of euthanasia - Adjunctive methods of euthanasia - Death confirmation - Euthanasia of mice, rats, hamsters, and guinea pigs - Euthanasia of rabbits - Common mistakes in animal euthanasia - Specific methods of euthanasia - Discarding animal remnants and carcasses | 65 |
| Reporting the results of laboratory animal studies   - General topics in academic writing - ARRIVE guidelines | 40 |
