# Supplementary material for: E-learning course in laboratory animal science: participants’ characteristics and points of view
Source: Research Square preprint supplement (doi:10.21203/rs.3.rs-1538262/v1), 2022-04-26
Supplement: Supplementary file 2 [file 8068ebc9fd8a6d458dff22b8.docx]

This questionnaire is part of a research investigating the knowledge score and characteristics of the participants in the online educational course of Principles of Working with Laboratory Animals presented on the Aveed website. This questionnaire collects information related to your attendance in that online course. The information you enter in this questionnaire will be kept anonymous. Please completed this questionnaire if you consent to participate in the research.

In this text, the “e-course” means the online course of Principles of Working with Laboratory Animals lectured by Dr. Siavash Ahmadi-Noorbakhsh and sponsored by The National Institute for Medical Research Development and the Iranian National Ethics Committee for Biomedical Research.

| **Sociodemographic Questions** | **No.** | **Questions** |
| --- | --- | --- |
|  | Age |
|  | Gender |
|  | University major |
|  | The current degree (graduated or studying)   1. Ph.D. or doctorate 2. MD/DVM/DDS/PharmD 3. Master’s 4. Bachelor 5. Associate degree 6. High school diploma 7. Miscellaneous |
|  | Educational status   1. Graduated 2. Studying |
|  | Place of education (Please name the university or institution) |
|  | Place of work (Please name) |
|  | Academic ranking (if you are affiliated with an academic institution)   1. Professor 2. Associate professor 3. Assistant professor 4. Instructor |
| **Animal Use Experience** |  | How many years of work experience with animals did you have before attending the e-course? (If you did not have any work experience please write “0”; if you had less than one year of work experience please write “1”) |
|  | For what purpose do you use laboratory animals?   1. Thesis 2. Non-thesis research projects 3. Education 4. I do not use laboratory animals 5. Other purposes (please name) |
|  | Which animal species do you use for scientific purposes?   1. Mice 2. Rats 3. Hamsters 4. Guinea pigs 5. Rabbits 6. Dogs 7. Cats 8. Nonhuman primates 9. Fish 10. Insects 11. Other animal species (please name) |
|  | Had you attended other laboratory animal courses before enrolling in the e-course?   1. Yes 2. No |
|  | How many articles related to laboratory animals you have published in peer- reviewed journals? |
|  | How many books you have published regarding laboratory animals? |
|  | Have you ever taught in laboratory animal courses?   1. Yes 2. No |
| **Interaction With Animals** |  | How much do you agree with the use of animals for scientific purposes?   1. Very much agree 2. Agree 3. I have no idea (neutral) 4. Disagree 5. Very much disagree |
|  | Do you generally like animals?   1. I very much like animals 2. I like animals 3. Moderate (not like and not dislike) 4. I don't like animals 5. I hate animals |
|  | Do you like the laboratory animals that you use?   1. I very much like them 2. I like them 3. Moderate (not like and not dislike) 4. I don't like them 5. I hate them |
|  | Are you a member of an animal protection group?   1. Yes 2. No |
|  | Have you ever voluntarily helped in the treatment of a sick stray animal?   1. Yes 2. No |
|  | Do you feed or water stray animals?   1. Yes 2. No |
|  | Do you have a companion animal?   1. Yes 2. No |
|  | What is the species of your companion animal? |
| **Course Enrollment Factors** |  | How did you find the e-course?   1. Recommendation by others 2. Recommendation by the university/ institution 3. Searching on the Internet 4. Randomly saw it on the Aveed website 5. Advertisements 6. Other (please name) |
|  | Was your attendance in the e-course voluntary or mandatory?   1. Voluntary 2. Mandatory |
|  | What was your goal for attending the e-course?   1. Learning 2. Receiving certificate 3. Professional curiosity 4. Other (please name) |
|  | How do you compare the cost of the e-course with the quality and quantity of the delivered information through the course?   1. Very high cost 2. High cost 3. Moderate cost 4. Low cost 5. Very low cost |
| **Course Completion Factors** |  | Which of the below sentences applies to you?   1. After attending the e-course, I am less interested in using laboratory animals due to ethical matters 2. After attending the e-course, I am more interested in using laboratory animals 3. Attending the e-course has not had any effect on my interest in using laboratory animals |
|  | How much are you satisfied with the content of the e-course?   1. Very satisfied 2. Satisfied 3. Neither satisfied nor dissatisfied 4. Dissatisfied 5. Very dissatisfied |
|  | To what extent your attitude toward working with laboratory animals has changed after attending the e-course?   1. Very much 2. Much 3. Moderate 4. Few 5. Very few |
|  | To what extent your technical knowledge in working with laboratory animals have changed after attending the e-course?   1. Very much 2. Much 3. Moderate 4. Few 5. Very few |
|  | To what extent attending the e-course has had an effect in increasing the quality of your research or your articles?   1. Very much 2. Much 3. Moderate 4. Few 5. No effect |
|  | Do you recommend attending the e-course to your friends and colleagues?   1. Yes 2. No 3. I have no idea |
|  | Do you agree that the content of the e-course to be delivered as a university unit?   1. Yes 2. No 3. I have no idea |
|  | If we provide a new course to cover practical techniques in working with laboratory animals, would you attend that course?   1. Yes 2. No 3. I have no idea |
|  | Have you used the certificate of the e-course for applying for Permission to Use Animals overseas?   1. Yes (please name the country) 2. No |
|  | Has your overseas application for Permission to Use Animals been accepted?   1. Yes 2. No |
|  | Which subject of the e-course was the most important to you? |
|  | Which subject of the e-course was the least important to you? |
|  | In which subject(s) regarding working with laboratory animals, you like to receive more information? |
|  | Please write any comments/suggestions/feedback you may have about the e-course. |
