# Supplementary material for: E-learning course in laboratory animal science: participants’ characteristics and points of view
Source: Research Square preprint supplement (doi:10.21203/rs.3.rs-1538262/v1), 2022-04-26
Supplement: Supplementary file 4 [file 8bdef9d6c7cc33446296d111.docx]

Course enrolment factors (N=231). Participants could select more than one option.

| **Parameter** | **Frequency** | **Percentage** |
| --- | --- | --- |
| How did you find the e-course? |  |  |
| Recommendation by the university/research institution | 129 | 55.8 |
| Recommendation by others | 71 | 30.7 |
| Searching in the Internet | 45 | 19.5 |
| Randomly saw it on the Aveed website | 24 | 10.4 |
| Advertisements (Not originated from Aveed website) | 6 | 2.6 |
| Others | 5 | 2.2 |
| What was your goal for attending the e-course? |  |  |
| Learning | 180 | 77.9 |
| Receiving certification | 150 | 64.9 |
| Professional curiosity | 31 | 13.4 |
| Others | 10 | 4.3 |
| How do you compare the cost of the e-course with the quality and quantity of delivered information through the course? |  |  |
| Moderate cost | 93 | 53.4 |
| low cost | 48 | 27.6 |
| Very low cost | 18 | 10.3 |
| High cost | 11 | 6.3 |
| Very high cost | 4 | 2.3 |
